# Supplementary material
Source: PubMed Central journal article supplement (PMC2678678)
Supplement: NIHMS81084-supplement-01.pdf [file NIHMS81084-supplement-01.pdf]

**Supplemental Figure 1. Nmnat expression protects against Complex I inhibitor-mediated axonal degeneration in DRG neurons.** DRG neurons were treated with pyridaben (Pyr), or fenpyroximate (Fen) (2.5  $\mu$ M ) for 24 hr time and phase contrast microscopy was used to assess axonal degeneration. (n=6 wells per condition from duplicate experiments).

**Supplemental Figure 2. Nmnat slows TBHP induced axonal degeneration.** Representative images of DRG neuronal axons treated with 50  $\mu$ M TBHP after 48 hr and visualized by fluorescence microscopy. (Top) GFP fluorescence (Bottom) Phase contrast microscopy.

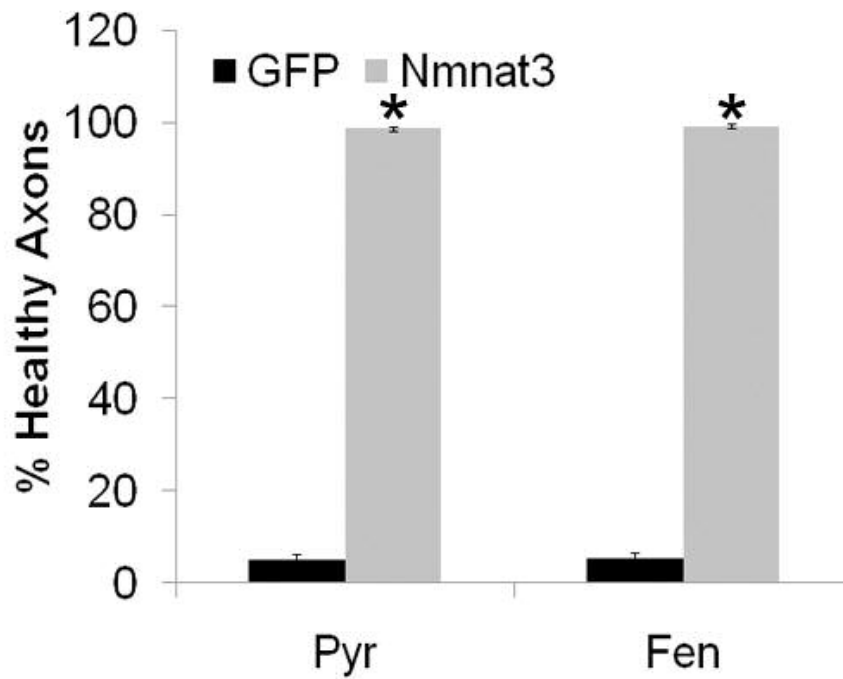

**Supplemental Figure 1. Nmnat expression protects against Complex I inhibitor-mediated axonal degeneration in DRG neurons. DRG neurons were treated with pyridaben (Pyr), or fenpyroximate (Fen) ( $2.5 \mu\text{M}$ ) for 24 hr time and phase contrast microscopy was used to assess axonal degeneration. (n=6 wells per condition from duplicate experiments).**

49x35mm (300 x 300 DPI)

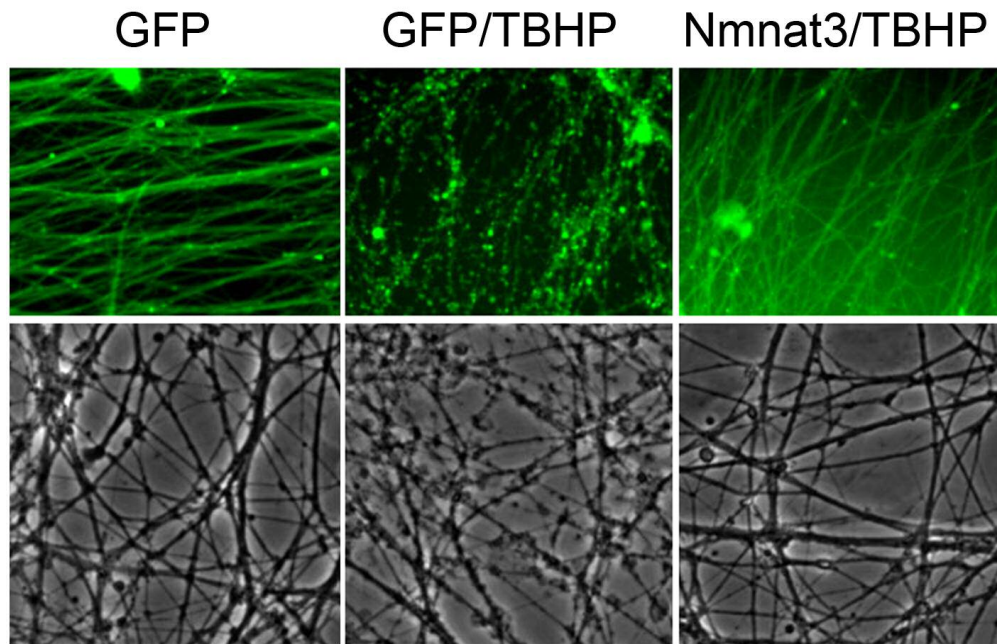

**Supplemental Figure 2. Nmnat slows TBHP induced axonal degeneration. Representative images of DRG neuronal axons treated with 50  $\mu$ M TBHP after 48 hr and visualized by fluorescence microscopy. (Top) GFP fluorescence (Bottom) Phase contrast microscopy. 59x47mm (600 x 600 DPI)**
